# Supplementary material for: Selenite Reduction and the Biogenesis of Selenium Nanoparticles by Alcaligenes faecalis Se03 Isolated from the Gut of Monochamus alternatus (Coleoptera: Cerambycidae)
Source: PubMed Central journal article supplement (PMC6164237; doi:10.3390/ijms19092799), 2018-09-17
Supplement: ijms-19-02799-s001.pdf [file ijms-19-02799-s001.pdf]

Table S1-1 Shapiro-Wilk test results of bacterial growth of SeO3 (without SeO<sub>3</sub><sup>2-</sup>)\*

| Time courses | Mean of 3 Replicates<br>(Log <sub>10</sub> CFU/mL) | SD      | W Statistics | P-value | Level of significance | Conclusion |
|--------------|----------------------------------------------------|---------|--------------|---------|-----------------------|------------|
| 0            | 6.10333                                            | 0.03215 | 0.95107      | 0.57402 | 0.05                  | Accept     |
| 6            | 6.34667                                            | 0.08737 | 0.94651      | 0.08737 | 0.05                  | Accept     |
| 12           | 6.73000                                            | 0.08544 | 0.98973      | 0.08544 | 0.05                  | Accept     |
| 18           | 7.31333                                            | 0.05686 | 0.93557      | 0.05686 | 0.05                  | Accept     |
| 24           | 7.84667                                            | 0.08021 | 0.99482      | 0.08021 | 0.05                  | Accept     |
| 30           | 7.97667                                            | 0.18771 | 0.97138      | 0.18771 | 0.05                  | Accept     |
| 36           | 8.02667                                            | 0.10693 | 0.96429      | 0.10693 | 0.05                  | Accept     |
| 42           | 7.87333                                            | 0.11015 | 0.99725      | 0.11015 | 0.05                  | Accept     |
| 48           | 7.81333                                            | 0.11676 | 0.97005      | 0.11676 | 0.05                  | Accept     |

\* Shapiro-Wilk test: H<sub>0</sub>:Data are normally distributed; H<sub>A</sub>: Data are not normally distributed

Table S1-2 Shapiro-Wilk test results of bacterial growth of SeO3 (with 1 mM SeO<sub>3</sub><sup>2-</sup>)\*

| Time courses | Mean of 3 Replicates<br>(Log <sub>10</sub> CFU/mL) | SD      | W Statistics | P-value | Level of significance | Conclusion |
|--------------|----------------------------------------------------|---------|--------------|---------|-----------------------|------------|
| 0            | 6.06011                                            | 0.0755  | 0.98684      | 0.78044 | 0.05                  | Accept     |
| 6            | 6.37667                                            | 0.07572 | 0.85465      | 0.25297 | 0.05                  | Accept     |
| 12           | 6.54333                                            | 0.06429 | 0.87097      | 0.29827 | 0.05                  | Accept     |
| 18           | 7.23333                                            | 0.06807 | 0.91187      | 0.42435 | 0.05                  | Accept     |
| 24           | 7.88010                                            | 0.09539 | 0.99176      | 0.82638 | 0.05                  | Accept     |
| 30           | 7.89333                                            | 0.06506 | 0.99803      | 0.91523 | 0.05                  | Accept     |
| 36           | 7.92667                                            | 0.08505 | 0.88479      | 0.33861 | 0.05                  | Accept     |
| 42           | 7.75667                                            | 0.06807 | 0.91187      | 0.42435 | 0.05                  | Accept     |
| 48           | 7.64333                                            | 0.05508 | 0.82418      | 0.17362 | 0.05                  | Accept     |

\* Shapiro-Wilk test: H<sub>0</sub>:Data are normally distributed; H<sub>A</sub>: Data are not normally distributed

Table S1-3 Shapiro-Wilk test results of bacterial growth of Se03 (with 5 mM  $\text{SeO}_3^{2-}$ )\*

| Time courses | Mean of 3 Replicates<br>( $\text{Log}_{10}$ CFU/mL) | SD      | W Statistics | P-value | Level of significance | Conclusion |
|--------------|-----------------------------------------------------|---------|--------------|---------|-----------------------|------------|
| 0            | 6.05667                                             | 0.07767 | 0.93232      | 0.49736 | 0.05                  | Accept     |
| 6            | 6.29100                                             | 0.07211 | 0.94231      | 0.53674 | 0.05                  | Accept     |
| 12           | 6.54333                                             | 0.05508 | 0.82418      | 0.17362 | 0.05                  | Accept     |
| 18           | 7.35667                                             | 0.10017 | 0.8995       | 0.38392 | 0.05                  | Accept     |
| 24           | 7.77333                                             | 0.08505 | 0.99885      | 0.93516 | 0.05                  | Accept     |
| 30           | 7.84000                                             | 0.09539 | 0.99176      | 0.82638 | 0.05                  | Accept     |
| 36           | 7.77667                                             | 0.07638 | 0.96429      | 0.63689 | 0.05                  | Accept     |
| 42           | 7.73000                                             | 0.09165 | 0.96429      | 0.63689 | 0.05                  | Accept     |
| 48           | 7.63333                                             | 0.10786 | 0.8596       | 0.26647 | 0.05                  | Accept     |

\* Shapiro-Wilk test: H0:Data are normally distributed; HA: Data are not normally distributed

Table S1-4 Shapiro-Wilk test results of  $\text{SeO}_3^{2-}$  concentration in Se03 culture at different culture times (1 mM  $\text{SeO}_3^{2-}$ )\*

| Time courses | Mean of 3 Replicates<br>(mM) | SD      | W Statistics | P-value | Level of significance | Conclusion |
|--------------|------------------------------|---------|--------------|---------|-----------------------|------------|
| 0            | 0.99010                      | 0.01000 | 1.00000      | 1.00000 | 0.05                  | Accept     |
| 6            | 0.95400                      | 0.00889 | 0.91456      | 0.43346 | 0.05                  | Accept     |
| 12           | 0.89333                      | 0.01762 | 0.98684      | 0.78044 | 0.05                  | Accept     |
| 18           | 0.52600                      | 0.01136 | 0.85465      | 0.25297 | 0.05                  | Accept     |
| 24           | 0.07480                      | 0.00632 | 0.99324      | 0.84283 | 0.05                  | Accept     |
| 30           | 0.01247                      | 0.0015  | 0.99852      | 0.92652 | 0.05                  | Accept     |
| 36           | 0.00467                      | 0.00306 | 0.96429      | 0.63689 | 0.05                  | Accept     |
| 42           | 0.00283                      | 0.00229 | 0.92308      | 0.46326 | 0.05                  | Accept     |
| 48           | 0.00179                      | 0.0025  | 0.99838      | 0.92311 | 0.05                  | Accept     |

\* Shapiro-Wilk test: H0:Data are normally distributed; HA: Data are not normally distributed

Table S1-5 Shapiro-Wilk test results of  $\text{SeO}_3^{2-}$  concentration in Se03 culture at different culture times (5 mM  $\text{SeO}_3^{2-}$ )\*

| Time courses | Mean of 3 Replicates (mM) | SD      | W Statistics | P-value | Level of significance | Conclusion |
|--------------|---------------------------|---------|--------------|---------|-----------------------|------------|
| 0            | 4.98333                   | 0.01528 | 0.96429      | 0.63689 | 0.05                  | Accept     |
| 6            | 4.91000                   | 0.06000 | 1.0000       | 1.00000 | 0.05                  | Accept     |
| 12           | 4.81267                   | 0.05605 | 0.9983       | 0.92128 | 0.05                  | Accept     |
| 18           | 4.53400                   | 0.17868 | 0.79683      | 0.10694 | 0.05                  | Accept     |
| 24           | 3.98167                   | 0.17614 | 0.9815       | 0.73939 | 0.05                  | Accept     |
| 30           | 2.80967                   | 0.09501 | 0.99985      | 0.97679 | 0.05                  | Accept     |
| 36           | 0.82437                   | 0.01240 | 0.94469      | 0.54660 | 0.05                  | Accept     |
| 42           | 0.15067                   | 0.01528 | 0.96429      | 0.63689 | 0.05                  | Accept     |
| 48           | 0.00094                   | 0.00106 | 0.77803      | 0.06307 | 0.05                  | Accept     |

\* Shapiro-Wilk test: H0:Data are normally distributed; HA: Data are not normally distributed

Table S1-6 Shapiro-Wilk test results of  $\text{Se}^0$  concentration in Se03 culture at different culture times (1 mM  $\text{SeO}_3^{2-}$ )\*

| Time courses | Mean of 3 Replicates (mM) | SD      | W Statistics | P-value | Level of significance | Conclusion |
|--------------|---------------------------|---------|--------------|---------|-----------------------|------------|
| 0            | 0.00910                   | 0.0004  | 1.00000      | 1.00000 | 0.05                  | Accept     |
| 6            | 0.02110                   | 0.0030  | 1.00000      | 1.00000 | 0.05                  | Accept     |
| 12           | 0.05120                   | 0.00917 | 0.96429      | 0.63689 | 0.05                  | Accept     |
| 18           | 0.21333                   | 0.01662 | 0.98522      | 0.76726 | 0.05                  | Accept     |
| 24           | 0.54533                   | 0.04477 | 0.98798      | 0.79023 | 0.05                  | Accept     |
| 30           | 0.73067                   | 0.02082 | 0.92308      | 0.46326 | 0.05                  | Accept     |
| 36           | 0.87533                   | 0.01716 | 0.98188      | 0.74213 | 0.05                  | Accept     |
| 42           | 0.91200                   | 0.01825 | 0.81757      | 0.15717 | 0.05                  | Accept     |
| 48           | 0.93710                   | 0.02402 | 0.91681      | 0.44121 | 0.05                  | Accept     |

\* Shapiro-Wilk test: H0:Data are normally distributed; HA: Data are not normally distributed

Table S1-7 Shapiro-Wilk test results of Se<sup>0</sup> concentration in Se03 culture at different culture times (5 mM SeO<sub>3</sub><sup>2-</sup>)\*

| Time courses | Mean of 3 Replicates (mM) | SD      | W Statistics | P-value | Level of significance | Conclusion |
|--------------|---------------------------|---------|--------------|---------|-----------------------|------------|
| 0            | 0.00014                   | 0.00068 | 0.81757      | 0.15717 | 0.05                  | Accept     |
| 6            | 0.05067                   | 0.00709 | 0.97351      | 0.68777 | 0.05                  | Accept     |
| 12           | 0.10200                   | 0.01758 | 0.88107      | 0.32755 | 0.05                  | Accept     |
| 18           | 0.32667                   | 0.02892 | 0.90424      | 0.39914 | 0.05                  | Accept     |
| 24           | 0.72733                   | 0.04041 | 0.97959      | 0.72623 | 0.05                  | Accept     |
| 30           | 1.85233                   | 0.01501 | 0.99852      | 0.92652 | 0.05                  | Accept     |
| 36           | 3.42167                   | 0.12846 | 0.77969      | 0.06687 | 0.05                  | Accept     |
| 42           | 4.40800                   | 0.19010 | 1.00000      | 1.00000 | 0.05                  | Accept     |
| 48           | 4.52500                   | 0.07622 | 0.9887       | 0.79658 | 0.05                  | Accept     |

\* Shapiro-Wilk test: H<sub>0</sub>:Data are normally distributed; H<sub>A</sub>: Data are not normally distributed

Table S1-8 Shapiro-Wilk test results of expression levels of selected genes assessed using real-time PCR (fold changes)\*

| genes              | Mean of 3 Replicates (fold changes) | SD      | W Statistics | P-value | Level of significance | Conclusion |
|--------------------|-------------------------------------|---------|--------------|---------|-----------------------|------------|
| <i>gshB</i>        | 1.03513                             | 0.13191 | 0.88351      | 0.3348  | 0.05                  | Accept     |
| <i>BV899_18870</i> | 1.08669                             | 0.05032 | 0.96086      | 0.61966 | 0.05                  | Accept     |
| <i>CysI</i>        | 4.22199                             | 0.16337 | 0.99745      | 0.90348 | 0.05                  | Accept     |
| <i>BV899_03375</i> | 2.23210                             | 0.04459 | 0.89218      | 0.36101 | 0.05                  | Accept     |
| <i>BV899_02360</i> | 4.77585                             | 0.14891 | 1.00000      | 0.99600 | 0.05                  | Accept     |
| <i>BV899_10955</i> | 1.94098                             | 0.10633 | 0.9906       | 0.81454 | 0.05                  | Accept     |
| <i>BV899_06125</i> | 9.62880                             | 1.18768 | 0.92511      | 0.4706  | 0.05                  | Accept     |

\* Shapiro-Wilk test: H<sub>0</sub>:Data are normally distributed; H<sub>A</sub>: Data are not normally distributed; *gshB*: glutathione synthetase, *BV899\_18870*: flavoprotein sulfite reductase; *CysI*: sulfite reductase, *BV899\_03375*:sulfate transporter subunit; *BV899\_02360*: thioredoxin reductase, *BV899\_10955*:peroxiredoxin, *BV899\_06125*:superoxide dismutase
